# Supplementary material for: A versatile spaceborne architecture for immediate monitoring of the global methane pledge
Source: Copernicus journal article supplement (doi:10.5194/acp-2022-518), 2022-07-21
Supplement: Supplementary file 1 [file acp-2022-518-supplement.pdf]

Supplementary Information for

# A versatile spaceborne architecture for immediate monitoring of the global methane pledge

Yuchen Wang<sup>1</sup>, Xvli Guo<sup>1</sup>, Yajie Huo<sup>1</sup>, Mengying Li<sup>2</sup>, Yuqing Pan<sup>1\*</sup>, Shaocai Yu<sup>2\*</sup>, Alexander Baklanov<sup>3</sup>, Daniel Rosenfeld<sup>4</sup>, John H. Seinfeld<sup>5</sup>, and Pengfei Li<sup>1\*</sup>

<sup>1</sup>College of Science and Technology, Hebei Agricultural University, Baoding, Hebei 071000, P.R. China

<sup>2</sup>Research Center for Air Pollution and Health; Key Laboratory of Environmental Remediation and Ecological Health, Ministry of Education, College of Environment and Resource Sciences, Zhejiang University, Hangzhou, Zhejiang 310058, P.R. China

<sup>3</sup>Science and Innovation Department, World Meteorological Organization (WMO), Geneva, Switzerland

<sup>4</sup>Institute of Earth Science, The Hebrew University of Jerusalem, Jerusalem, Israel

<sup>5</sup>Division of Chemistry and Chemical Engineering, California Institute of Technology, Pasadena, CA 91125, USA

\*Correspondence to: Pengfei Li (lpf\_zju@163.com)

Shaocai Yu (shaocaiyu@zju.edu.cn)

Yuqing Pan (panyuqing@hebau.edu.cn)

## 20 1. Methods for uncertainty analysis

21 (1) Uncertainties in the PRISMA-based methane retrievals. The PRISMA-based methane retrievals can present systematic and  
22 random errors. We thus evaluated their performance using end-to-end simulations, as shown in previous studies. First, the  
23 ideal plumes were prescribed via the large-eddy-driven Weather and Research Forecasting Model (the WRF-Chem-LES  
24 model)[1]. The key configuration included common wind fields (i.e., 3.5 m/s), high resolution (i.e.,  $30 \times 30 \text{ m}^2$ ), and constant  
25 emission rates (e.g., 500, 1000, and 1500 kg/h). On this basis, uncorrelated noises with random increments were then added.  
26 They represented the expected instrument precision presenting normal distributions with zero mean biases and standard  
27 deviations of 1 ~ 5 %. Second, the enhancements of volume mixing ratios were converted into two-way spectral atmospheric  
28 transmittance. The calculation basis included air mass factors based on the real observation zenith angles, vertical profiles of  
29 dry air column densities, and methane absorption cross-section data. These three data came from the satellite instrument records,  
30 ERA5 reanalysis dataset, and the HIGH-resolution TRANsmission molecular absorption (HITRAN2016) database. Third, the  
31 subsequent transmittance spectra were convolved with the PRISMA-based spectral responses and then multiplied by the  
32 original PRISMA top-of-atmosphere radiance spectrums. To prevent across-track variations in spectral calibration, we  
33 performed such processes on a per-column basis. Finally, the resulting PRISMA-based top-of-atmosphere radiance images  
34 were processed with the same matched-filter algorithm over the cases explored in this work. Methane retrieval results via the  
35 WRF-Chem-LES simulations and associated biases were presented in Table S3. Therefore, we did not observe systematic  
36 errors in the PRISMA-based methane retrievals. Detailed evaluations are shown in Supplementary Information.

37 (2) Uncertainties in the TROPOMI-based methane emission estimates. We provided independent emission estimates for the  
38 TROPOMI-based methane hotspots using the WRF-Chem model. On this basis, the differences between the WRF-Chem-  
39 based and IME-based results reflected the intrinsic uncertainties in the IME method.

40 The WRF simulation was nudged to National Centers for Environmental Prediction final analysis data at  $0.25^\circ \times 0.25^\circ$  spatial  
41 resolution and six-hour temporal resolution. For each hotspot, the model was performed at  $5 \times 5 \text{ km}^2$  horizontal resolution  
42 over a  $50 \times 50 \text{ km}^2$  domain. The boundary condition was obtained from the CAMS reanalysis dataset. Note that the inner  
43 domain did not feedback with the outer domain (i.e., so-called one-way nested simulations). The grid-specific methane  
44 emissions were originally taken from the bottom-up emission inventories (EDGARv6.0). Other general configurations could  
45 be found in our previous studies[2,3].

46 Methane emissions were estimated via the Bayesian inverse solution which optimized a single state vector  $\mathbf{x}$  as:

47 
$$\hat{\mathbf{x}} = \mathbf{x}_A + \mathbf{S}_A \mathbf{K}^T (\mathbf{K} \mathbf{S}_A \mathbf{K}^T + \mathbf{S}_C)^{-1} (\mathbf{y} - \mathbf{K} \mathbf{x}_A), \text{ (Eq. 6)}$$

48 where  $\hat{\mathbf{x}}$  was the optimized state vector containing individual elements for daily emissions as well as daily background  
49 concentrations;  $\mathbf{x}_A$  was the prior taken as the mean reported emission rate from the bottom-up emission inventories;  $\mathbf{K}$  was the  
50 Jacobian constructed by running perturbation simulations for the state vector element;  $\mathbf{S}_A$  was the prior error covariance matrix  
51 using 100% error for the emissions and 10% for the boundary conditions;  $\mathbf{y}$  contained the TROPOMI observations; and  $\mathbf{S}_C$  was

the observational error covariance matrix using as error the standard deviation of the difference between the prior model and the observations (20 ppb).

Because of uncertainties in meteorology, the WRF output sometime before or after the observation time can give a better simulation of the scene. Hence, we sampled model simulations one hour before and after the optimal time at 15-min time intervals. To ensure that small mismatches between the locations in the simulated and TROPOMI-based hotspots do not lead to underestimated emissions, we then averaged TROPOMI pixels together on a  $3 \times 3$  grid before the inversion and estimated the observational error following the central limit theorem (i.e. dividing by  $\sqrt{\mathbf{n}}$  where  $\mathbf{n}$  is the number of observations).

The IME method can also be constrained by the WRF-Chem-based wind fields. On this basis, the subsequent TROPOMI-based methane emission estimates could be compared with the original IME-based results (i.e., driven by the ERA5 reanalysis data). The resulting differences would reflect the impacts of the wind data on the IME-based methane emission estimates.

From this analysis, we concluded that the TROPOMI-based methane emission estimates based on the IME method were reliable, the errors of which could be controlled within -40% (Table S2). Detailed evaluations are shown in Supplementary Information.

(3) Uncertainties in the PRISMA-based methane emission estimates. We provided independent emission estimates for the PRISMA-based methane plumes using the WRF-Chem-LES model[4]. The differences between the WRF-CHEM-LES-based and IME-based results reflected the intrinsic uncertainties in the IME method. For each plume, this model was conducted at  $30 \times 30 \text{ m}^2$  horizontal resolution over a  $3 \times 3 \text{ km}^2$  domain. This resolution and domain size allowed the placement and resolving of the individual plume and kept the computational and storage costs at a reasonable level. Each simulation had 121 vertical levels, with  $\sim 3 \text{ m}$  for the first three layers and  $\sim 10 \text{ m}$  for the upper layers up to the model top at 2 km height. The terrain information in the inner domain was obtained from the United States Geological Survey (<http://ned.usgs.gov/>) at 1/3 arc-second ( $\sim 10 \text{ m}$ ) resolution representative of the areas where the methane plumes were active. The boundary condition was obtained from a regional CTM (the two-way coupled WRF-CMAQ model) simulation with  $3 \times 3 \text{ km}^2$  horizontal resolution over a  $12 \times 12 \text{ km}^2$  domain. Other configurations were shown in our previous results[2,3,5]. Note that the inner domain did not feedback with the outer domain (i.e., so-called one-way nested simulations). This configuration would not affect our results as the simulated plumes would not touch the boundaries of the inner domain. Each simulation was performed for five hours. The first three hours served as a spin-up period, while the rest two hours were used for analysis. The time step for the inner domain is 0.1 s, and instantaneous values were saved every second (i.e., every ten time-steps). Confidence intervals were obtained from the t-statistic calculated every 5 minutes during the simulation, starting from 15 minutes before and ending 15 minutes after the satellite overpass.

For each plume, its nominal emission magnitude was assumed to be 1000 kg/h. On this basis, the emission magnitude was scaled by matching the total mass of excess methane in the simulated plume. The specific grids that the plume covered were defined using the “contourLines” function of R with a custom threshold (i.e., 2.5% of the total mass of excess methane, corresponding to the variance of the scene-based methane retrieval). The identified grids would not be sensitive to the configuration of the threshold due to the sharp plume edge. Meanwhile, the local background was defined within 1 km of the

86 emission source. Finally, we adjusted the scale factor to best match the area-integrated total mass of excess methane of the  
87 observed plume. On this basis, the WRF-Chem-LES-based emission estimates were achieved. Collectively, the differences  
88 between the WRF-Chem-LES-based and IME-based results reflected the intrinsic uncertainties in the IME method.  
89 The IME method can also be constrained by the WRF-Chem-LES-based wind fields. On this basis, the subsequent PRISMA-  
90 based methane emission estimates could be compared with the original IME-based results (i.e., driven by the ERA5 reanalysis  
91 data). The resulting differences would reflect the impacts of the wind data on the IME-based methane emission estimates.  
92 From this analysis, we concluded that the PRISMA-based methane emission estimates based on the IME method were reliable,  
93 the errors of which could be controlled within -70% (Table S3). Such uncertainties confirmed the precision errors of the  
94 estimated  $Q$  derived from the propagated errors in  $U_{10}$  and IME (Table S1). Detailed evaluations are shown in Supplementary  
95 Information.  
96 Note that such quantitative estimates of the errors were close to previous findings but might be unsuitable worldwide, especially  
97 for those occurring in more complex conditions. We thus expected that, as our framework was promoted, there was a profound  
98 need to conduct more WRF-Chem-LES simulations to investigate the performance of our framework in as many and as  
99 complex environments as possible.  
100 Besides, the second tier of our framework observed strong methane vestiges (i.e., likely plume tails) above the storage tanks  
101 in the Burgan field. We required to confirm that such vestiges were caused by the real plumes or the technical noises due to  
102 the surface albedo perturbations. As abovementioned, the latter had been corrected in the matched-filtered algorithm used in  
103 the second tier of our framework. To make our results more persuasive, we retrieved the PRISMA-based  $\Delta XCH_4$  together  
104 with surface albedo from just two spectral measurements, one featuring methane absorption (i.e., 2300 nm) and one not (i.e.,  
105 1700 nm). These two adjacent spectral bands were sufficiently close to have similar surface and aerosol reflectance properties  
106 but differed in their methane absorption properties. Specifically, we utilized these two spectral bands to launch the matched-  
107 filtered algorithm separately. The differences in the results would, in principle, eliminate surface albedo effects and thus isolate  
108 the signals of the methane plumes. Figure S13 shows that 2300 nm -driven matched-filtered algorithms resulted in noticeable  
109 methane vestiges above the storage tanks, while 1700 nm-driven algorithms did not find such signals. Therefore, we could  
110 infer that such signals may very well led by real methane plumes rather than technical noises, although on-site measurements  
111 were absent. Similar multi-spectral techniques have been widely used to retrieve signals of methane plumes from ground-  
112 based[6], airborne[7,8], and satellite-based[9,10] remote sensing instruments.

## 113 **2. Detailed uncertainty analysis for the PRISMA-based methane retrievals**

114 Methane retrievals from the PRISMA-based measurements presented systematic and random errors. Such errors were assessed  
115 by sensitivity analysis based on end-to-end simulations. At first glance via the top-of-atmosphere radiance at 2300 nm (Fig.  
116 S5), the cases in the Rumaila (Iraq) and Hassi Messaoud (Algeria) fields represented a preferable condition with a bright and  
117 homogeneous surface feature, while the cases in the Burgan (Kuwait) and Wattenberg (the United States) fields represented a

118 challenging condition because of a relatively dark and heterogeneous surface. By comparison, the case in Yangquan (China)  
119 was even more challenging, in which mountainous areas existed. In the most cases (except for the case in Fig. 1d4), the methane  
120 plumes were clearly uncorrelated with the surface brightness from space.

121 Figure S10 shows the maps of the resulting methane enhancements ( $\Delta\text{XCH}_4$ ) for the 1000 ~ 6000 kg/h emission sources over  
122 the plumes over the detected methane super-emitters. It was immediately clear that surface characteristics affected our  
123 retrievals strongly. For instance, at least the 1000 kg/h plumes would be needed for detection over a Burgan site (Fig. 1b3),  
124 and even higher than 2000 kg/h for a Hassi Messaoud site (Fig. 1e2). In addition, we found notable impacts of surface features  
125 on the PRISMA-based methane retrievals, which generated noise and false positives and can be eliminated by introducing the  
126 top-of-atmosphere radiance at 2300 nm (Fig. S5).

127 Figure S11 shows corresponding retrieval errors. Such errors denoted not only those caused by surface structures via absorption  
128 features of SWIR bands but also those due to random measurement noise. They were indicated by probability distribution  
129 functions generated by running the retrieval over a simulated image devoid of methane plumes (i.e., emission rate equal to 0  
130 kg/h). As a result, we found that these errors roughly flowed Gaussian distributions, likely due to the fact that random noise,  
131 rather than systematic noise driven by surface structures, dominated the whole errors. This again indicates a strong dependence  
132 of the retrieval error and subsequent plume detection limit on the surface feature.

133 Figure S12 represents more quantitative uncertain analysis for the retrieval performance. For each case, the input  $\Delta\text{XCH}_4$  maps  
134 were compared with the output  $\Delta\text{XCH}_4$  retrievals. Overall, they were sketchily consistent in terms of the slopes. The retrieval  
135 method performed the best for most of the cases, with a substantial number of pixels above the noise level, while more  
136 dispersed scatters were found in the Yangquan case (Fig. 1g2). The root mean squared errors (RMSE) could be controlled  
137 within the range of 37 ~ 127 ppb. Collectively, we did not observe systematic errors in this instrument and our algorithm (Fig.  
138 S6 and Figs. S10 and S11).

### 139 **3. Detailed uncertainty analysis for the TROPOMI-based methane emission estimates**

140 We provided independent evaluations for the IME-based emission estimates of the methane hotspots using the WRF-Chem  
141 model. Table S2 summarizes the differences in the methane emission estimates from these two different methods. The results  
142 from the WRF-Chem model were consistently lower than those from the IME method in an acceptable range (23 ~ 39%). Such  
143 divergencies could be narrowed to a large extent (17 ~ 34%) once the wind data in these two methods were unified to the  
144 WRF-Chem-based wind fields. This indicates the noticeable impacts of wind information on the IME method. Besides, we  
145 also found the inevitable uncertainties in the complex physical functions in the WRF-Chem model. A representative was that  
146 the WRF-Chem-based results accounted for the wind direction that, in contrast, was not considered in the IME method.

#### 147 **4. Detailed uncertainty analysis for the PRISMA-based methane emission estimates**

148 We applied the WRF-Chem-LES model to provide independent evaluations for the PRISMA-based methane emission  
149 estimates. The differences between the WRF-Chem-LES-based and IME-based results reflected the intrinsic uncertainties in  
150 the IME method. Table S3 presents the summary of the results. Overall, such differences could be controlled within -70%.  
151 Such divergencies were also mainly contributed by the differences in the wind fields between the WRF-LES-based results and  
152 the ERA5 reanalysis dataset. Yet, since all of the wind information was model product, we cannot know if the WRF-LES-  
153 based results were more reliable than the ERA5 reanalysis data. In theory, we could project that the WRF-LES-based results  
154 at a higher resolution might have a better performance.

155 On this basis, the IME method can be constrained by the simulated and reanalyzed (as before) wind data separately. The  
156 resulting differences reflected the impacts of wind speed on the IME method. As shown in Table S3, such differences reached  
157 up to -49%, which was within the precision errors of the IME method, as illustrated above. Besides, the comparison of the  
158 IME-based and WRF-Chem-LES results driven by the same simulated wind fields demonstrated that there were also strong  
159 uncertainties in the particular methane emission estimating method. Such uncertainties had an impact as high as that from the  
160 wind fields and, still, were not beyond uncertainties in the IME method.

161 Collectively, the results verified large methane emissions as reported in this work. The associated uncertainties were mainly  
162 due to wind fields and intrinsic model errors and can be controlled within -70%. It should be noted that our uncertain analysis  
163 might be only suitable for the cases in this work and more quantitative assessments based on the WRF-LES model are necessary  
164 to be promoted widely.

165

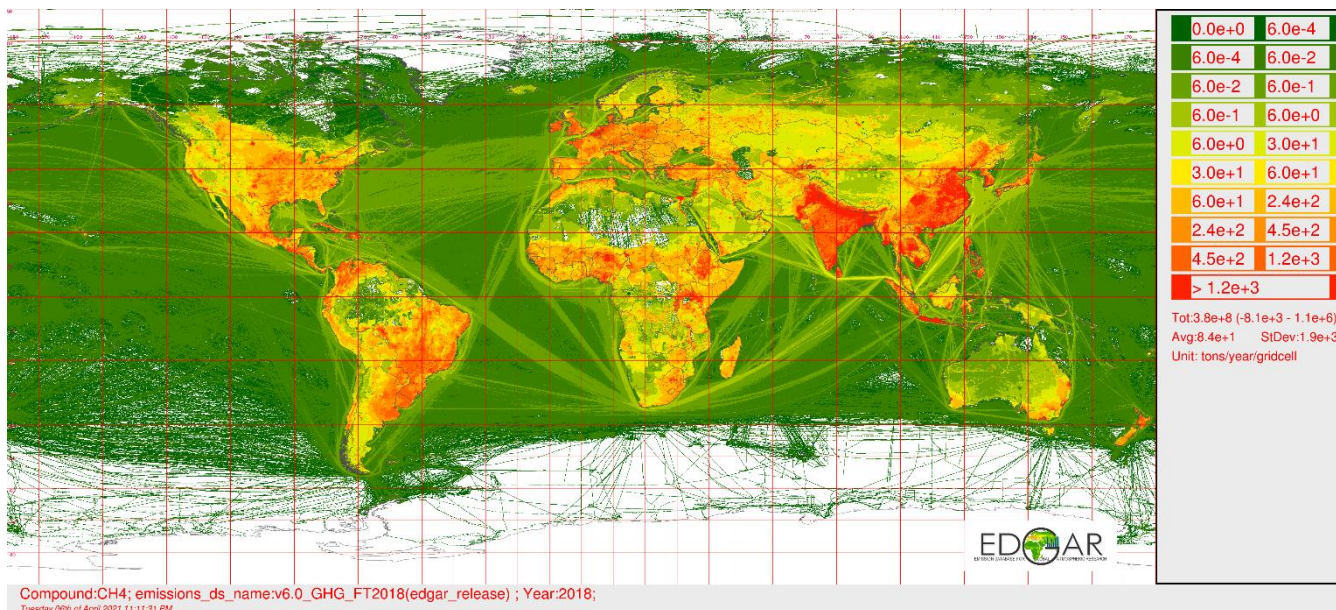

**Fig. S1. A state-of-the-art global methane emission map for 2018**[11]. The map was obtained from the EDGARv6.0 dataset (<https://edgar.jrc.ec.europa.eu/gallery?release=v60ghg&substance=CH4&sector=TOTALS>) (Last access: February 1, 2022).



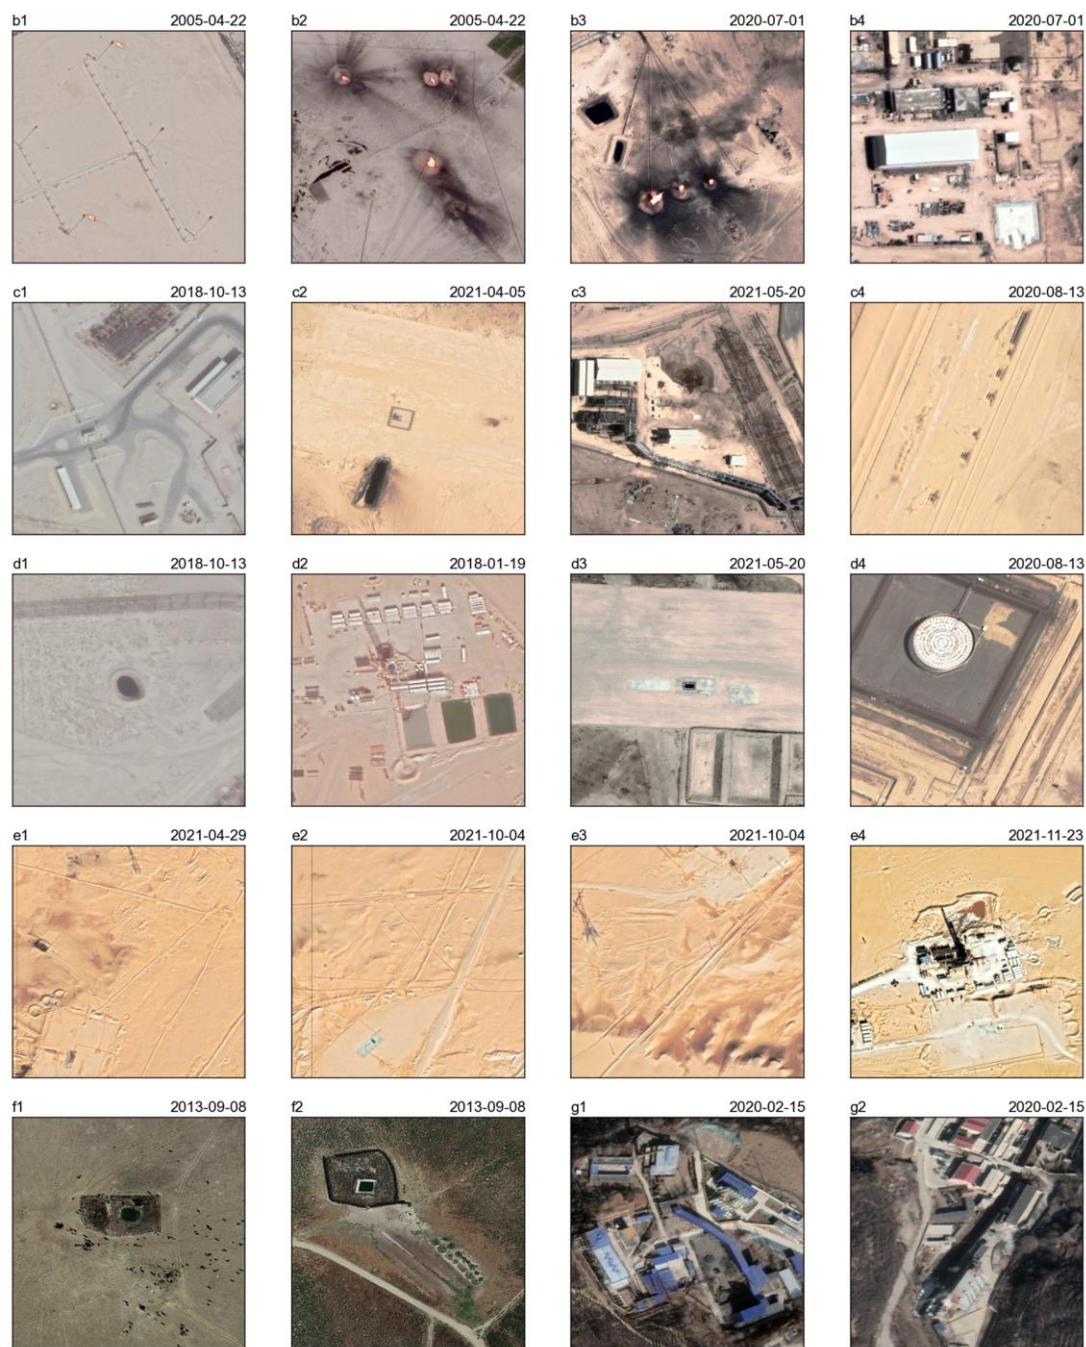

170  
 171 **Fig. S2. Attributions of the PRISMA-based methane plumes to specific plants or infrastructures.** The subpanels  
 172 successively correspond to the plumes in Figs. 1b1 ~ 1g2. For each plume, the map is zoomed to the maximum for visual  
 173 inspections. The overpass times of the satellites are also presented. The base maps are obtained from © Google Map.



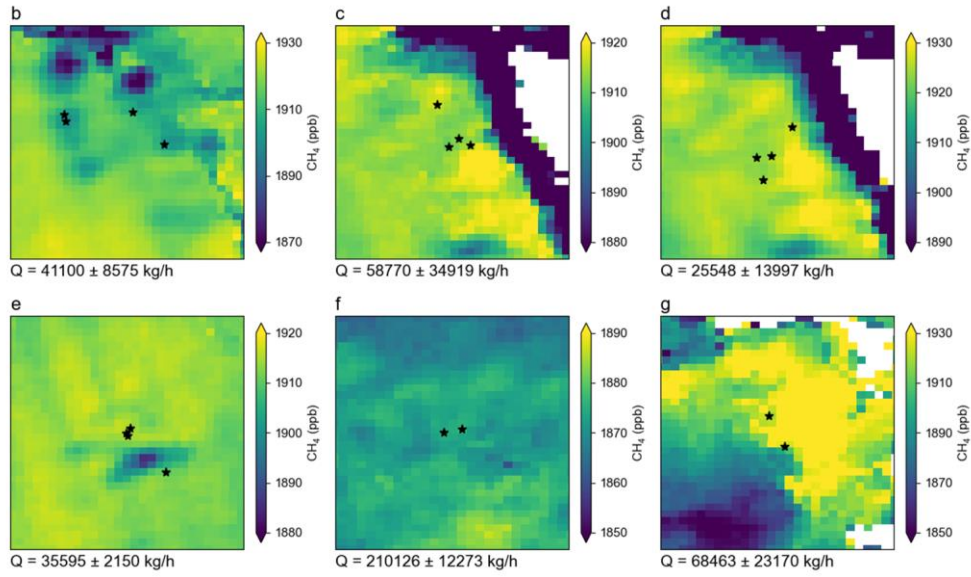

174  
 175 **Fig. S3. The same as Figs. 1b ~ 1g but the sampling window of the first-tiered monitoring is extended to one year. The**  
 176 **panel (c) shows the one-year average for 2020, while other panels for 2021. The five-pointed stars correspond to the black dots**  
 177 **in Fig. 1a. The oversampling technique ( $3 \times 3$  km<sup>2</sup>) is used to fuse long-term TROPOMI-based methane retrievals[12,13].**

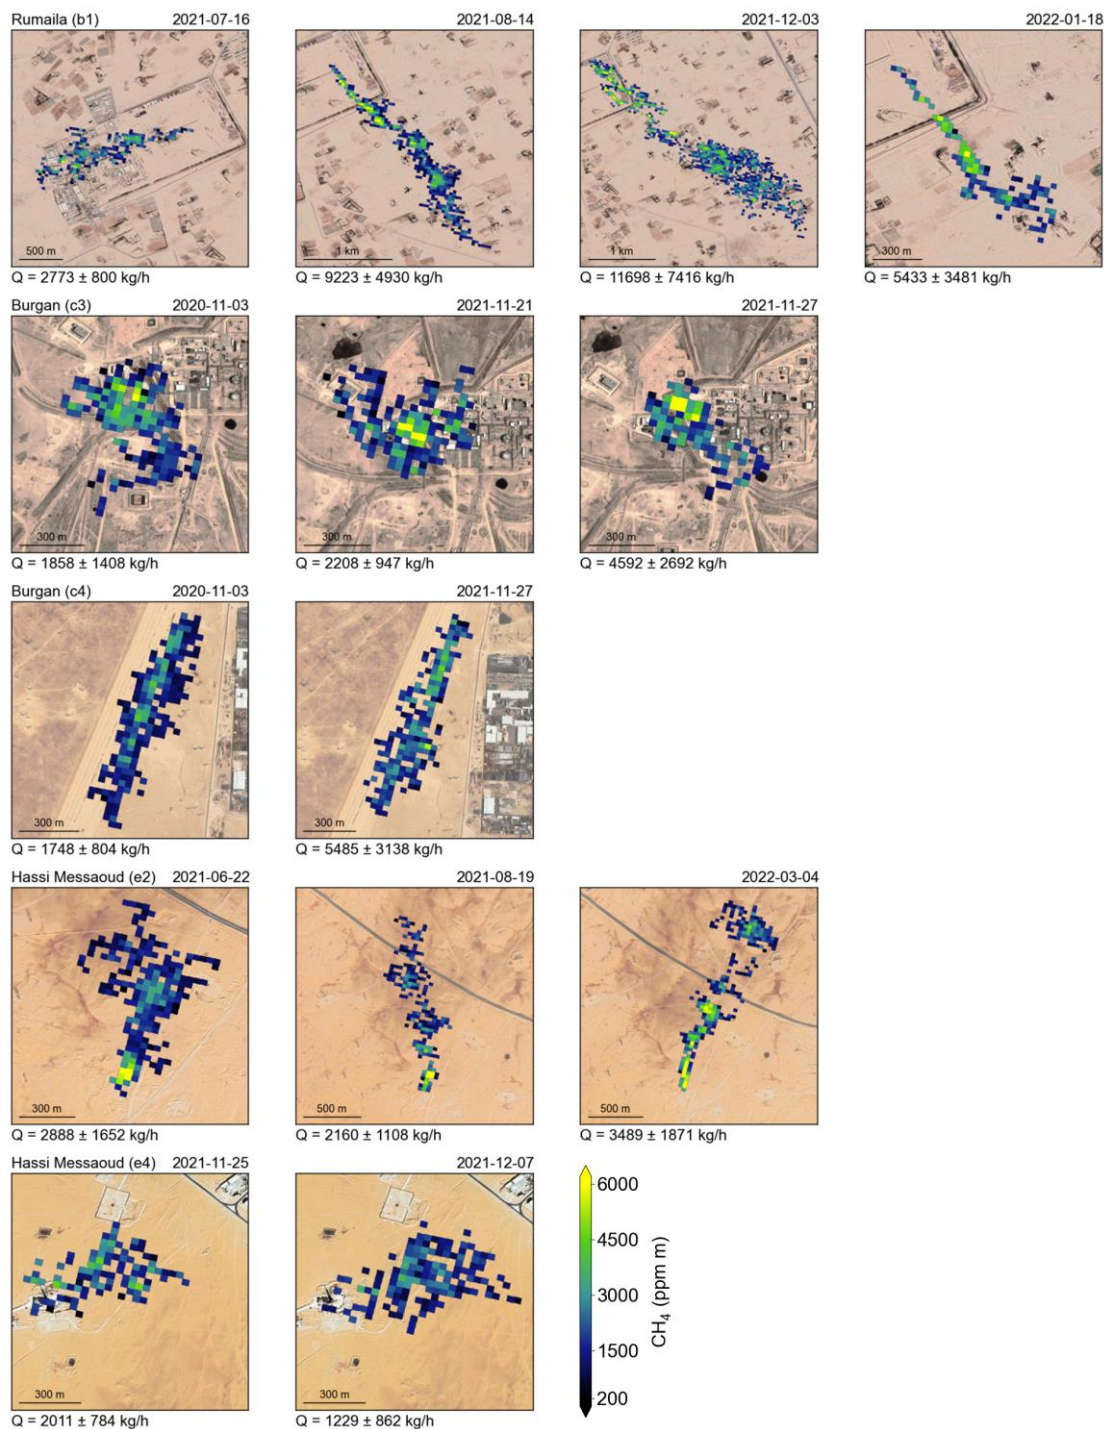

180

181 **Fig. S4. The same as Figs. 1b1, c3, c4, e2, and e4 but the sampling window of the second-tiered monitoring is extended.**

182 On this basis, more representatives are presented. The base maps are obtained from © Google Map.

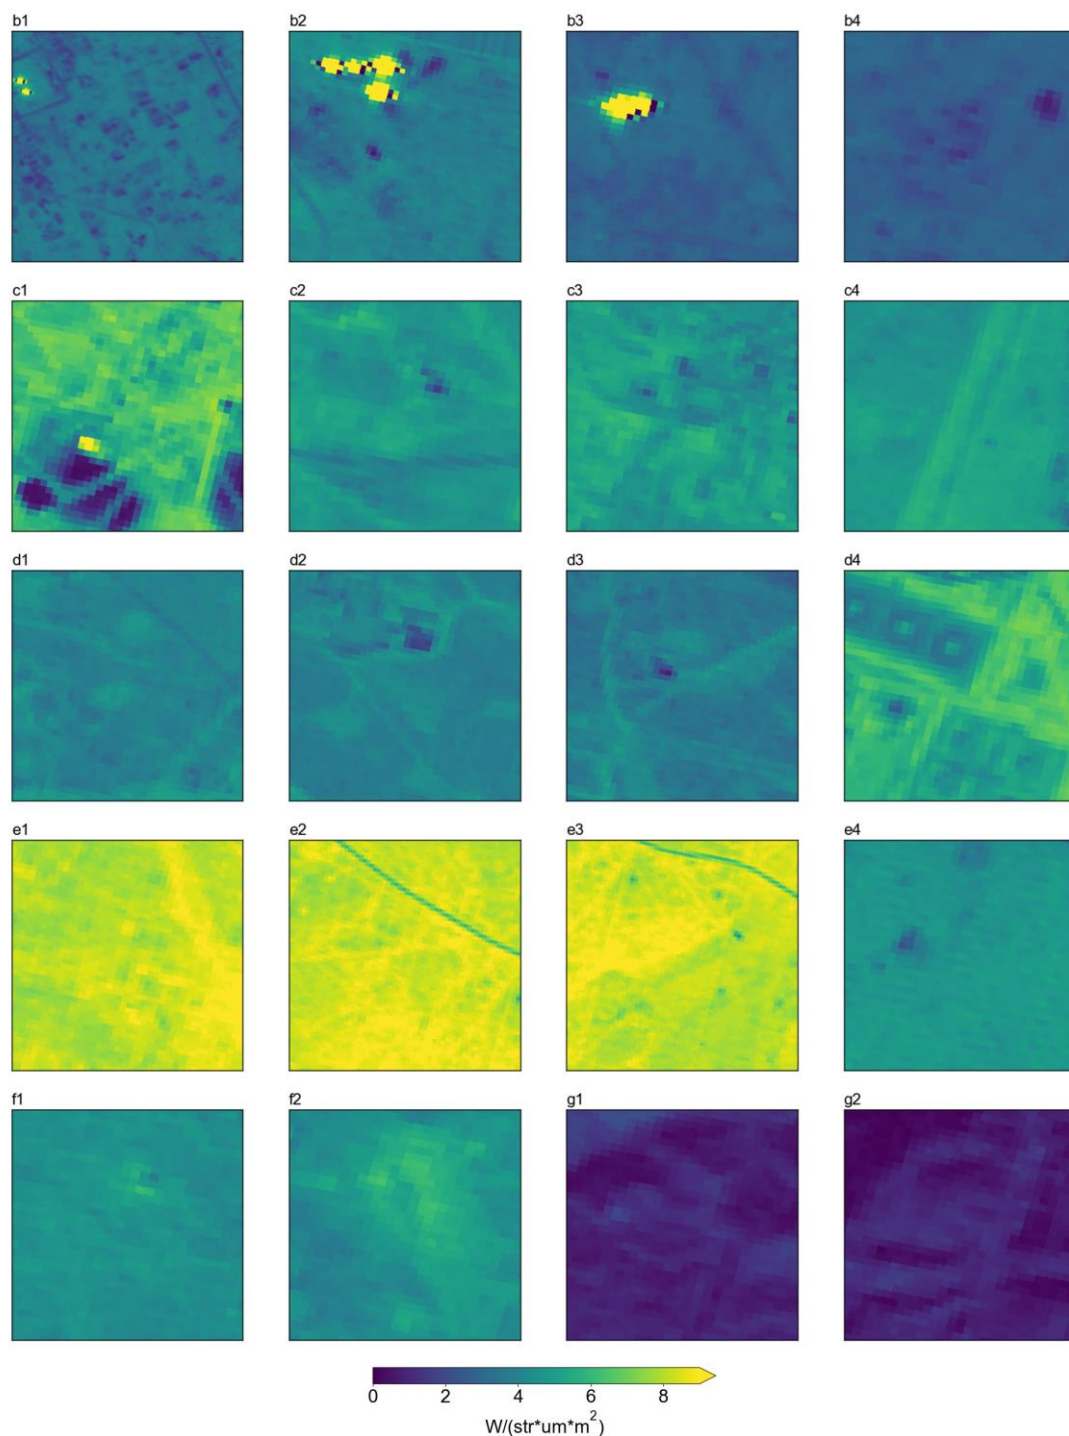

183  
 184 **Fig. S5. Maps of top-of-atmospheric radiance at 2300 nm for the methane plumes as shown in Figs. 1b ~ 1f.** The small  
 185 panels confirm that spatial distributions of methane plumes were clearly uncorrelated with those of surface brightness.

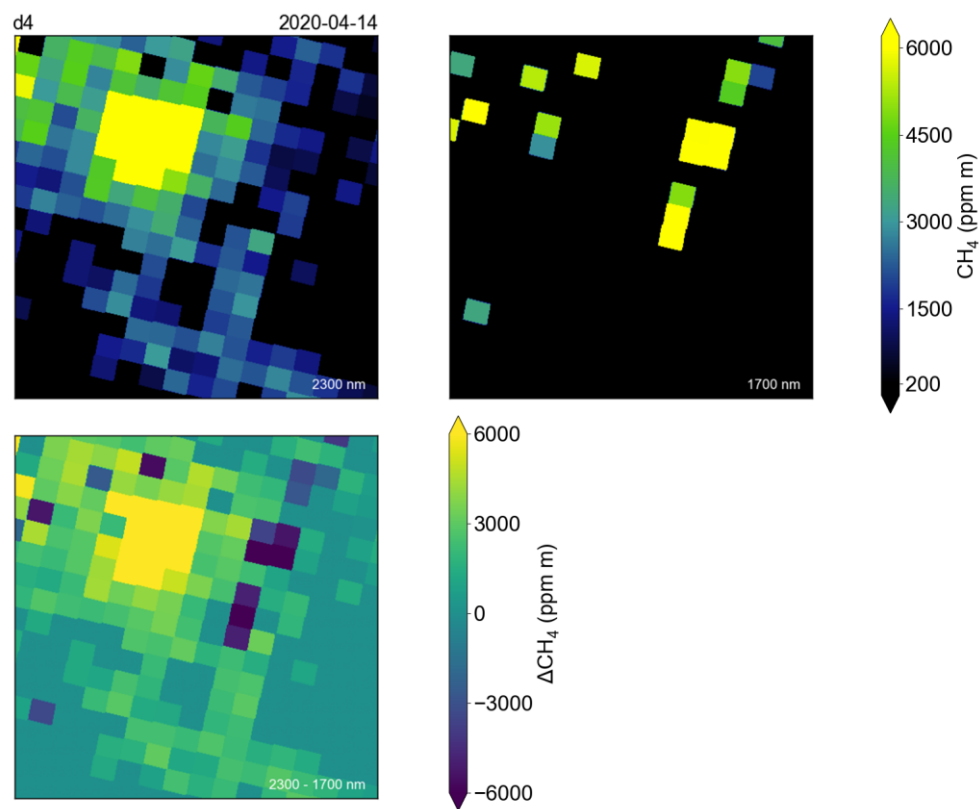

187

188 **Fig. S6. Methane vestiges above the storage tanks in the Burgan field retrieved by (a) 1700 nm- and (b) 2300 nm -**  
189 **driven matched-filtered algorithms. Their differences highlight the suspect methane leakage from the storage tanks (c).**



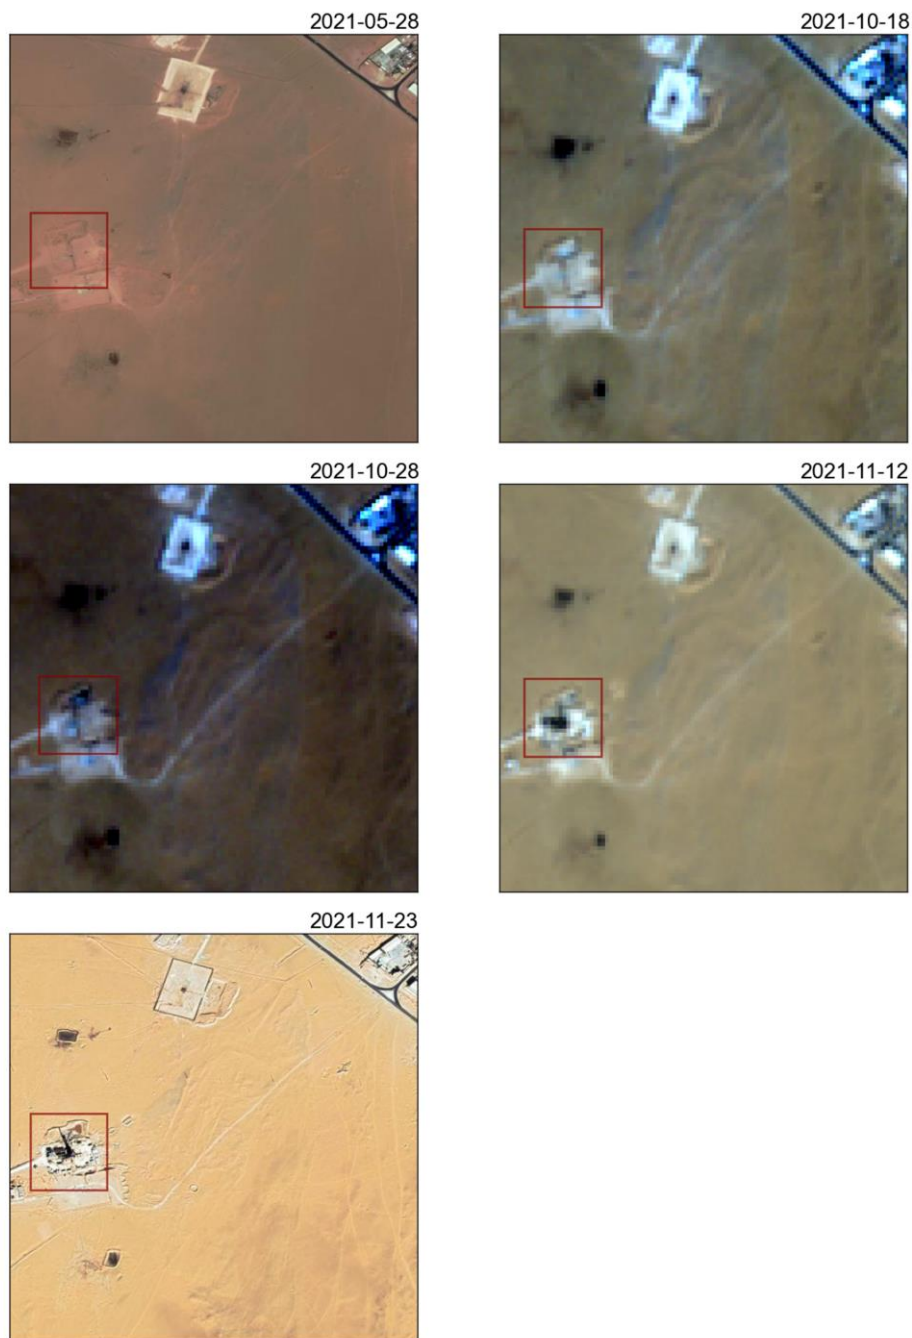

190  
 191 **Fig. S7. Historical maps of methane plumes in the Hassi Messaoud field (Fig. 1e4).** The satellite images for October 18th,  
 192 October 28th, and November 12th are obtained from the Sentinel-2 images, while others © Google Map. The red rectangle  
 193 marks the new methane super-emitter.

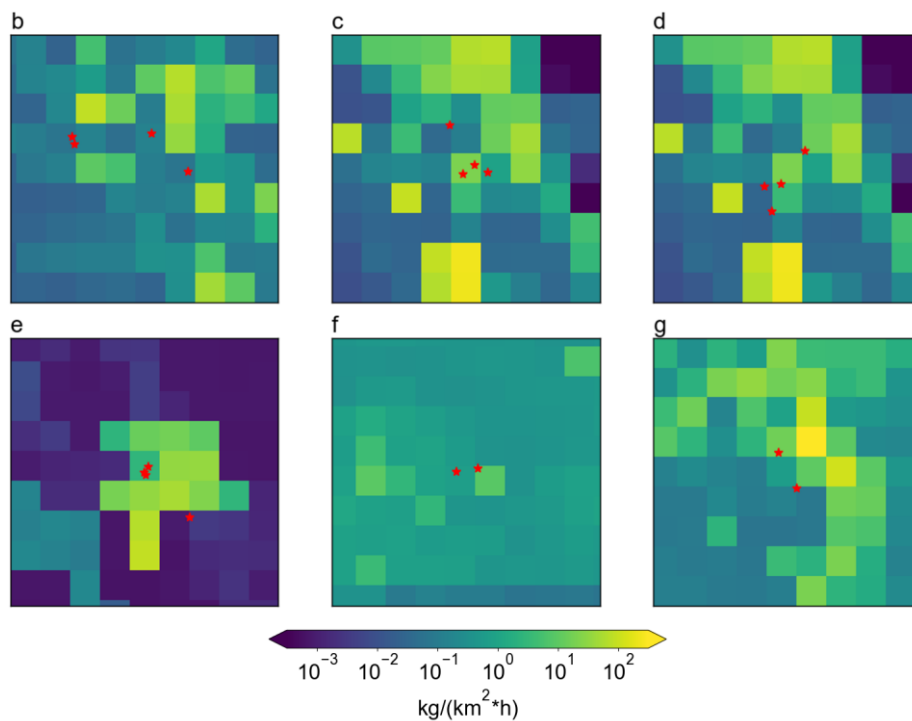

194  
 195 **Fig. S8. Spatial distributions of methane emissions in bottom-up emission inventories.** The panels successively correspond  
 196 to the regions in Figs. 1b ~ 1g. The five-pointed stars correspond to the black dots in Fig. 1a.

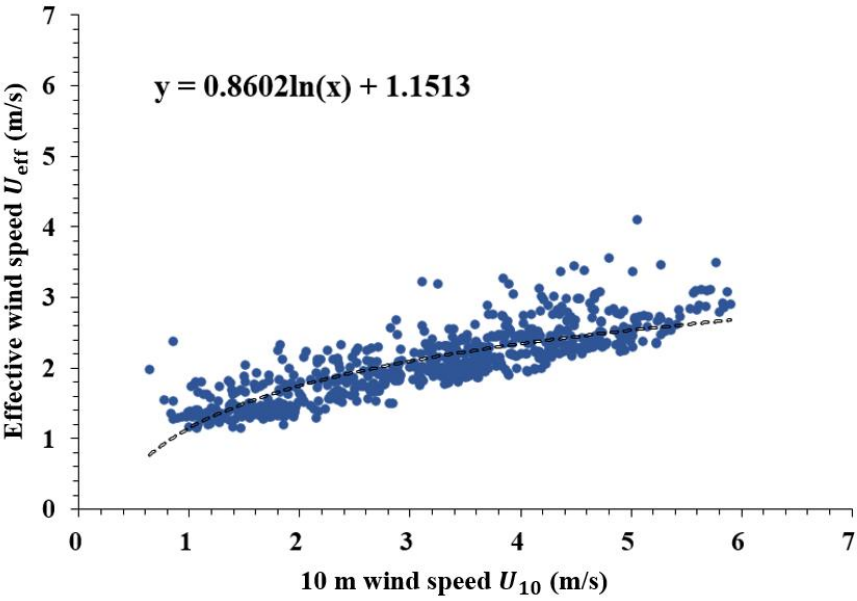

198

199 **Fig. S9. Relationship between the effective ( $U_{\text{eff}}$ ) and 10-m ( $U_{10}$ ) wind speeds in the second-tiered monitoring.** The LES  
200 plumes assuming 5% instrument precision.

201

202

203



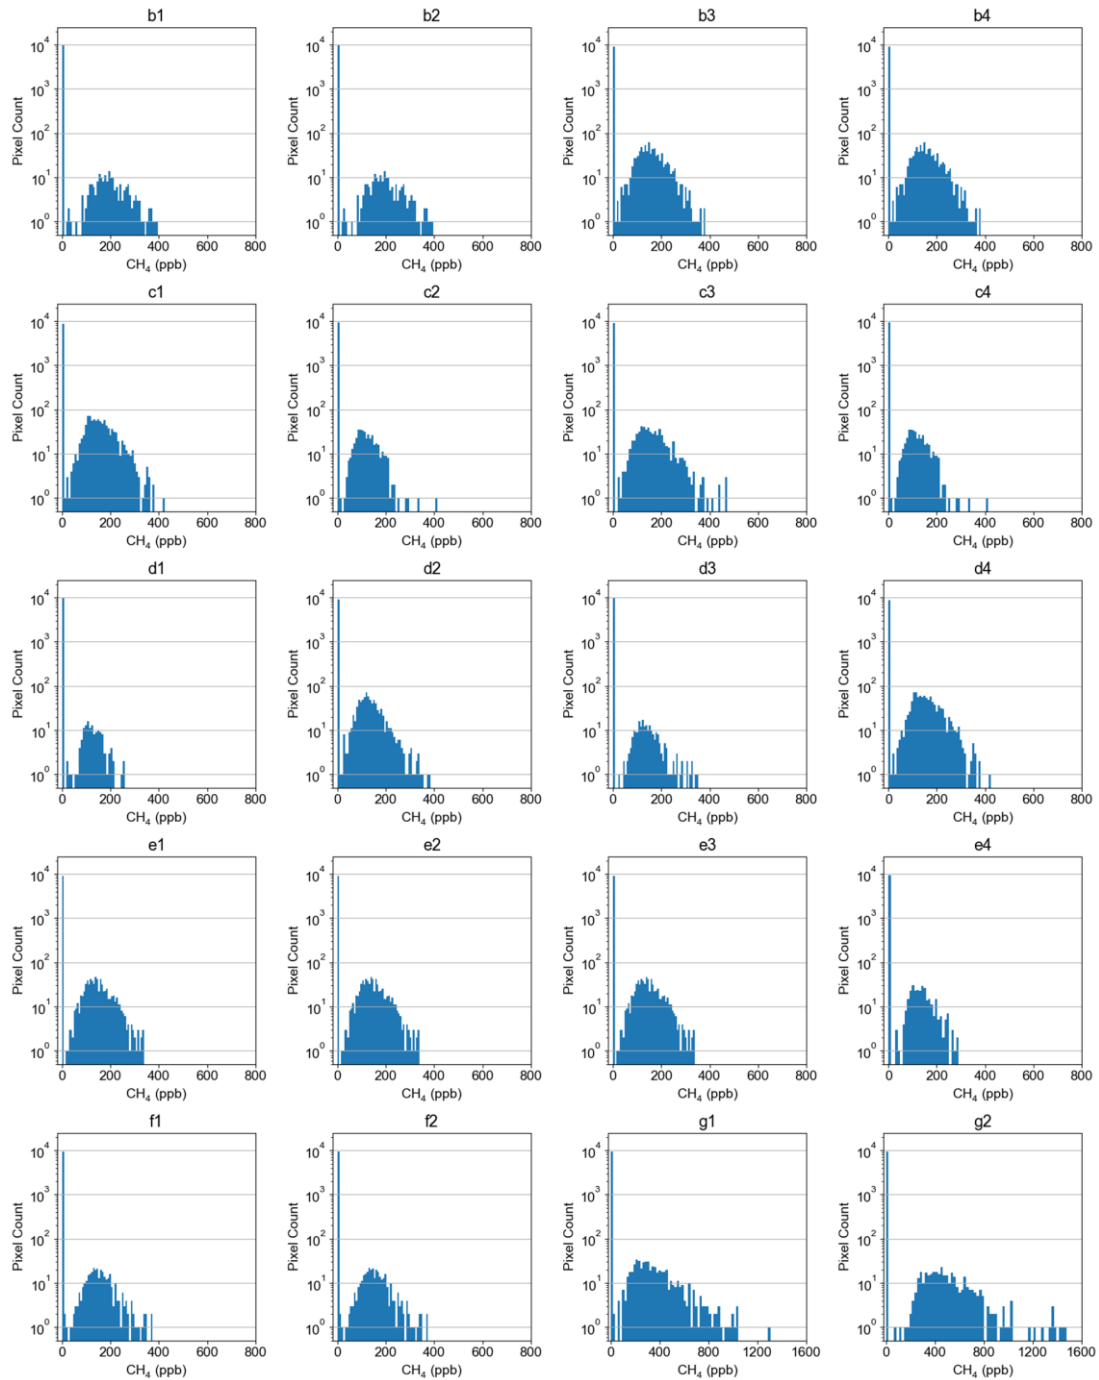

**Fig. S10. Histograms of the retrieved  $\Delta XCH_4$  inside the selected  $100 \times 100$  subset areas over the detected methane super-emitters for the no-plume cases.** The  $\mu$  and  $\sigma$  values represent the mean and standard deviation of the distributions, respectively. A Gaussian curve has been fitted to each distribution.

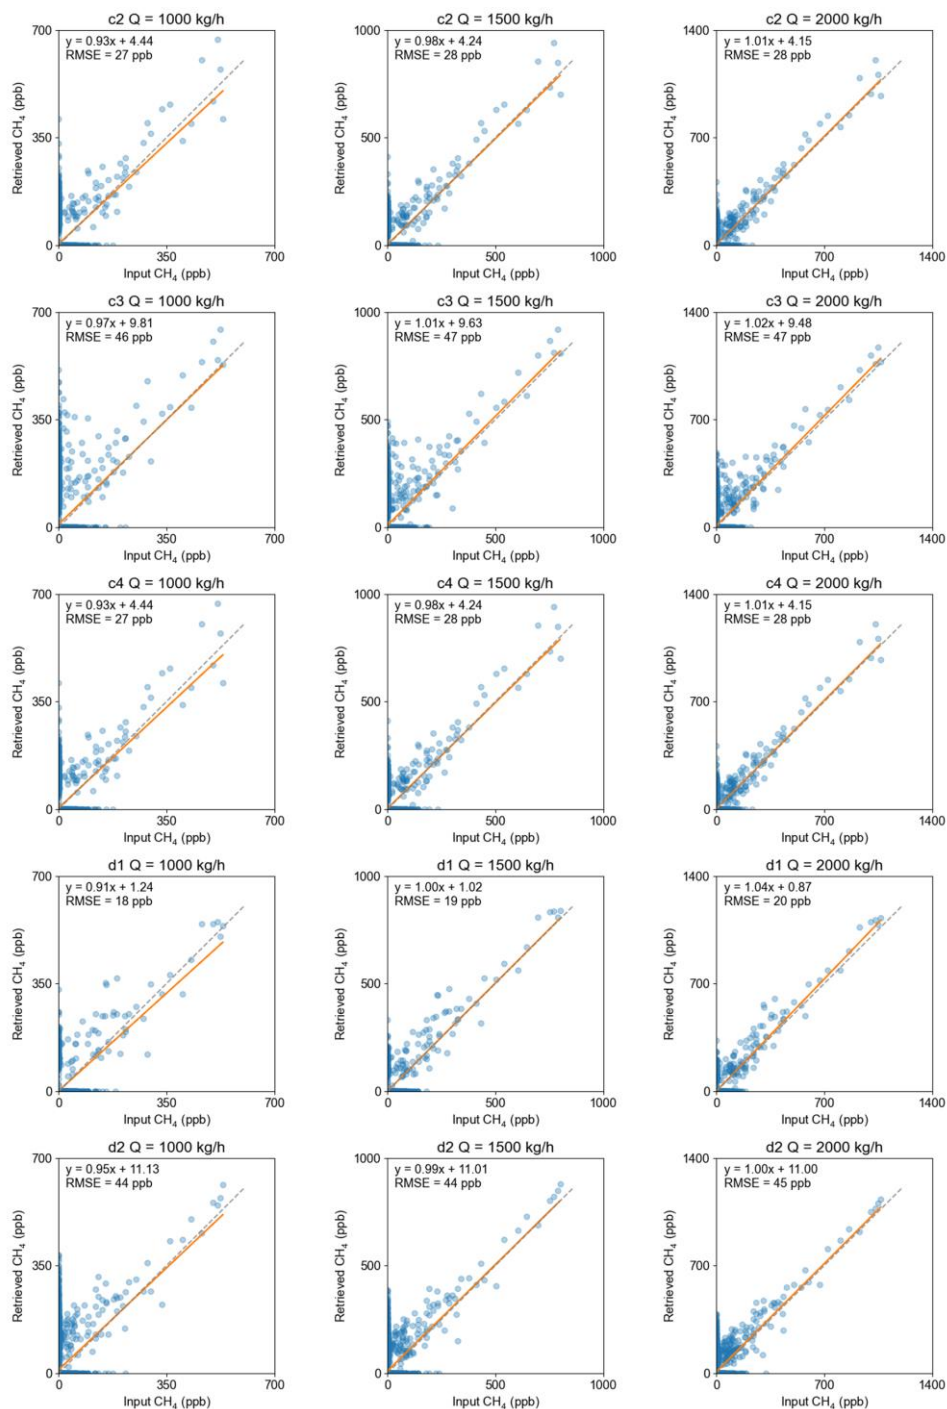

208  
209



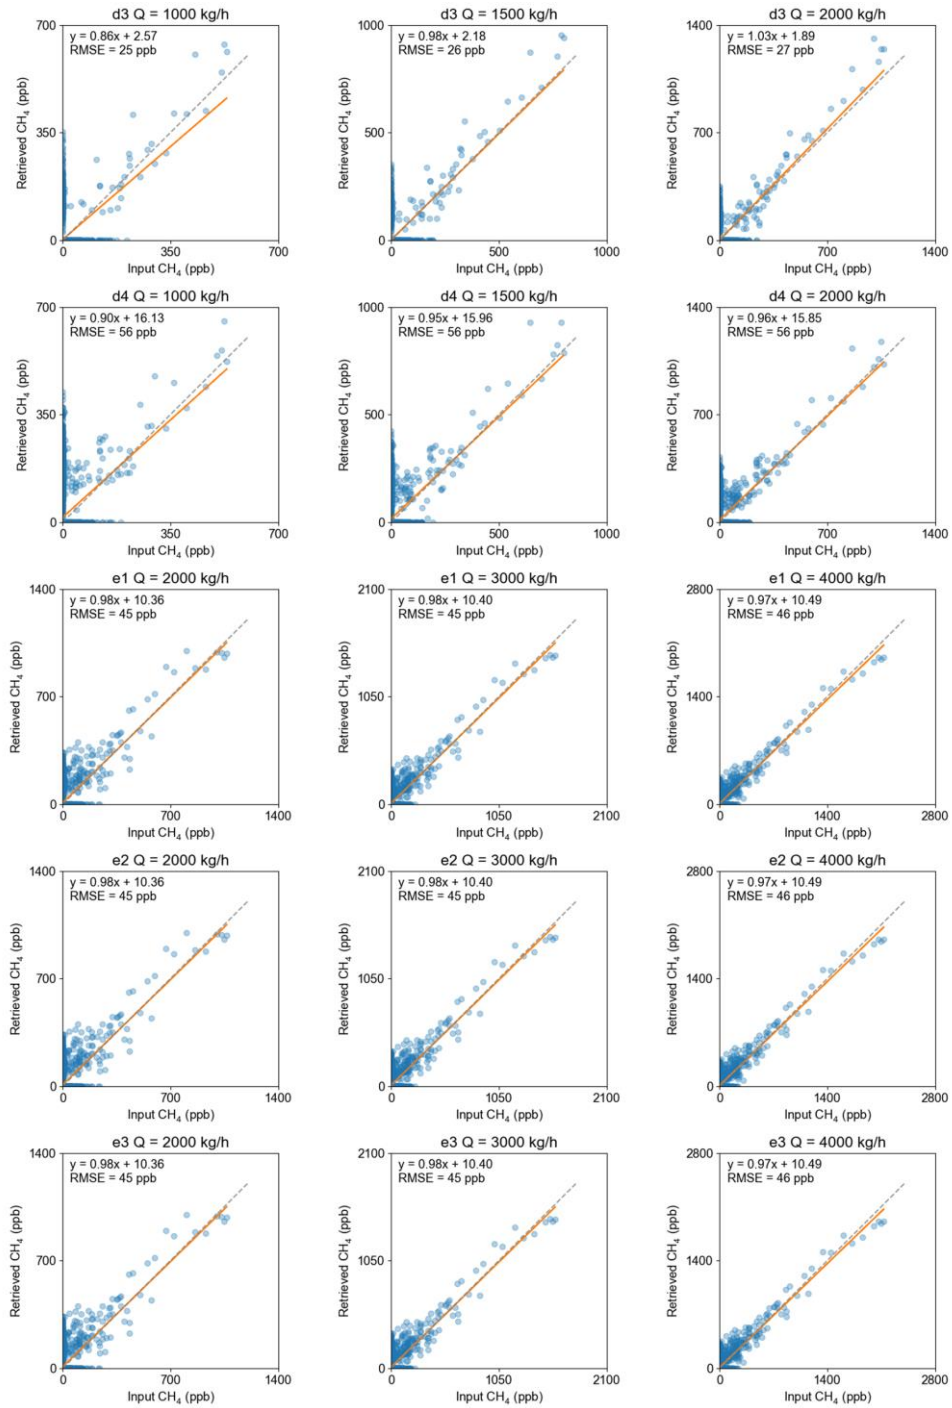

**Fig. S11. Scatter plots of the input and retrieved  $\Delta\text{XCH}_4$  for the simulations over the methane super-emitters. The dash and red lines represent the 1:1 line and fitted linear model, respectively.**

216 **Table S1. Summary of methane hotspots and associated super-emitters via our multi-tiered, space-based framework.**  
 217 Their emission rates, precision errors, locations (latitude and longitude), and corresponding figure panels are shown.

| Regions        | Figure panels | Latitude (°) | Longitude (°) | Emission rates | Precision errors |
|----------------|---------------|--------------|---------------|----------------|------------------|
|                |               |              |               | kg/h           | kg/h             |
| Rumaila        | b             | 30.300       | 47.580        | 46138          | 17580            |
| Rumaila        | b1            | 30.291       | 47.725        | 11698          | 7416             |
| Rumaila        | b2            | 30.416       | 47.604        | 5053           | 3961             |
| Rumaila        | b3            | 30.406       | 47.336        | 6569           | 4009             |
| Rumaila        | b4            | 30.382       | 47.345        | 1510           | 722              |
| Burgan         | c             | 29.000       | 48.000        | 7873           | 3509             |
| Burgan         | c1            | 28.980       | 47.989        | 1378           | 992              |
| Burgan         | c2            | 29.013       | 48.027        | 1543           | 831              |
| Burgan         | c3            | 29.145       | 47.943        | 1858           | 1408             |
| Burgan         | c4            | 28.988       | 48.072        | 1748           | 804              |
| Burgan         | d             | 29.000       | 48.000        | 6332           | 3954             |
| Burgan         | d1            | 28.947       | 47.978        | 1375           | 1067             |
| Burgan         | d2            | 28.855       | 47.946        | 3576           | 1495             |
| Burgan         | d3            | 28.940       | 47.921        | 4425           | 2653             |
| Burgan         | d4            | 29.058       | 48.057        | 3593           | 2541             |
| Hassi Messaoud | e             | 31.780       | 6.000         | 127676         | 59470            |
| Hassi Messaoud | e1            | 31.798       | 6.012         | 2757           | 1297             |
| Hassi Messaoud | e2            | 31.779       | 5.998         | 2160           | 1108             |
| Hassi Messaoud | e3            | 31.769       | 6.003         | 4326           | 2453             |
| Hassi Messaoud | e4            | 31.628       | 6.151         | 1229           | 862              |
| Wattenberg     | f             | 40.430       | -104.380      | 4805           | 2201             |
| Wattenberg     | f1            | 40.443       | -104.341      | 2023           | 867              |
| Wattenberg     | f2            | 40.430       | -104.412      | 1142           | 486              |
| Yangquan       | g             | 37.800       | 113.520       | 33594          | 16918            |
| Yangquan       | g1            | 37.746       | 113.551       | 7616           | 4413             |
| Yangquan       | g2            | 37.866       | 113.489       | 4382           | 2034             |

218

219 **Table S2. Comparison of the TROPOMI-based methane emission estimates between the IME and WRF-Chem method.**

| Figure | IME (kg/h) | WRF-Chem (kg/h) | IME-Wind* (kg/h) | (WRF-Chem - IME)/IME (%) | (IME-Wind - IME)/IME (%) |
|--------|------------|-----------------|------------------|--------------------------|--------------------------|
| b      | 46138      | 32758           | 36449            | -29                      | -21                      |
| c      | 7873       | 5117            | 5589             | -35                      | -29                      |
| d      | 6332       | 3863            | 4179             | -39                      | -34                      |
| e      | 127676     | 77882           | 105971           | -39                      | -17                      |
| f      | 4805       | 3700            | 4036             | -23                      | -16                      |
| g      | 33594      | 23516           | 24859            | -30                      | -26                      |

220 \*IME-Wind: the wind data in the IME method is constrained by the WRF-Chem model.

221 **Table S3. Comparison of the PRISMA-based methane emission estimates between the IME and WRF-Chem-LES**  
222 **method.**

| Figure | IME (kg/h) | WRF-Chem-LES (kg/h) | IME-Wind* (kg/h) | (WRF-Chem-LES - IME)/IME (%) | (IME-Wind - IME)/IME (%) |
|--------|------------|---------------------|------------------|------------------------------|--------------------------|
| b1     | 11698      | 5381.08             | 6784.84          | -54                          | -42                      |
| b2     | 5053       | 1869.61             | 3840.28          | -63                          | -24                      |
| b3     | 6569       | 3021.74             | 4926.75          | -54                          | -25                      |
| b4     | 1510       | 815.4               | 906              | -46                          | -40                      |
| c1     | 1378       | 454.74              | 1005.94          | -67                          | -27                      |
| c2     | 1543       | 972.09              | 972.09           | -37                          | -37                      |
| c3     | 1858       | 743.2               | 873.26           | -60                          | -53                      |
| c4     | 1748       | 1136.2              | 1293.52          | -35                          | -26                      |
| d1     | 1375       | 467.5               | 756.25           | -66                          | -45                      |
| d2     | 3576       | 2467.44             | 2717.76          | -31                          | -24                      |
| d3     | 4425       | 2566.5              | 3363             | -42                          | -24                      |
| d4     | 3593       | 1113.83             | 1832.43          | -69                          | -49                      |
| e1     | 2757       | 1792.05             | 1847.19          | -35                          | -33                      |
| e2     | 2160       | 1188                | 1576.8           | -45                          | -27                      |
| e3     | 4326       | 2509.08             | 2811.9           | -42                          | -35                      |
| e4     | 1229       | 516.18              | 749.69           | -58                          | -39                      |
| f1     | 2023       | 1456.56             | 1537.48          | -28                          | -24                      |
| f2     | 1142       | 787.98              | 833.66           | -31                          | -27                      |
| g1     | 7616       | 4569.6              | 5483.52          | -40                          | -28                      |
| g2     | 4382       | 2935.94             | 3067.4           | -33                          | -30                      |

223 \*IME-Wind: the wind data in the IME method is constrained by the WRF-Chem model.  
224  
225



226 **Reference.**

- 227 [1] Varon DJ, Jacob DJ, McKeever J, Jervis D, Durak BOA, Xia Y, et al. Quantifying methane point sources from fine-  
 228 scale satellite observations of atmospheric methane plumes. *Atmos Meas Tech* 2018;11:5673–86.  
 229 <https://doi.org/10.5194/amt-11-5673-2018>.
- 230 [2] Wang L, Yu S, Li P, Chen X, Li Z, Zhang Y, et al. Significant wintertime PM<sub>2.5</sub> mitigation in the  
 231 Yangtze River Delta, China from 2016 to 2019: observational constraints on anthropogenic emission controls.  
 232 *Atmos Chem Phys Discuss* 2020;2020:1–31. <https://doi.org/10.5194/acp-2020-510>.
- 233 [3] Wang L, Chen X, Zhang Y, Li M, Li P, Jiang L, et al. Switching to electric vehicles can lead to significant  
 234 reductions of PM<sub>2.5</sub> and NO<sub>2</sub> across China. *One Earth* 2021;4:1037–48.  
 235 <https://doi.org/https://doi.org/10.1016/j.oneear.2021.06.008>.
- 236 [4] Itziar I-L, Luis G, Yin-Nian L, J. VD, D. MJ, Yuzhong Z, et al. Satellite-based survey of extreme methane emissions  
 237 in the Permian basin. *Sci Adv* 2021;7:eabf4507. <https://doi.org/10.1126/sciadv.abf4507>.
- 238 [5] Mehmood K, Wu Y, Wang L, Yu S, Li P, Chen X, et al. Relative effects of open biomass burning and open crop  
 239 straw burning on haze formation over central and eastern China: Modeling study driven by constrained emissions.  
 240 *Atmos Chem Phys* 2020;20. <https://doi.org/10.5194/acp-20-2419-2020>.
- 241 [6] Innocenti F, Robinson R, Gardiner T, Finlayson A, Connor A. Differential Absorption Lidar (DIAL) Measurements  
 242 of Landfill Methane Emissions. *Remote Sens* 2017;9. <https://doi.org/10.3390/rs9090953>.
- 243 [7] Leifer I, Roberts D, Margolis J, Kinnaman F. In situ sensing of methane emissions from natural marine hydrocarbon  
 244 seeps: A potential remote sensing technology. *Earth Planet Sci Lett* 2006;245:509–22.  
 245 <https://doi.org/https://doi.org/10.1016/j.epsl.2006.01.047>.
- 246 [8] Roberts DA, Bradley ES, Cheung R, Leifer I, Dennison PE, Margolis JS. Mapping methane emissions from a marine  
 247 geological seep source using imaging spectrometry. *Remote Sens Environ* 2010;114:592–606.  
 248 <https://doi.org/https://doi.org/10.1016/j.rse.2009.10.015>.
- 249 [9] Varon DJ, Jervis D, McKeever J, Spence I, Gains D, Jacob DJ. High-frequency monitoring of anomalous methane  
 250 point sources with multispectral Sentinel-2 satellite observations. *Atmos Meas Tech* 2021;14:2771–85.  
 251 <https://doi.org/10.5194/amt-14-2771-2021>.
- 252 [10] Ehret T, Truchis A De, Mazzolini M, Morel J-M, d'Aspremont A, Lauvaux T, et al. Global Tracking and  
 253 Quantification of Oil and Gas Methane Emissions from Recurrent Sentinel-2 Imagery 2021.
- 254 [11] Janssens-Maenhout G, Crippa M, Guizzardi D, Muntean M, Schaaf E, Dentener F, et al. EDGAR v4.3.2 Global  
 255 Atlas of the three major greenhouse gas emissions for the period 1970–2012. *Earth Syst Sci Data* 2019;11:959–1002.  
 256 <https://doi.org/10.5194/essd-11-959-2019>.

- 257 [12] Sun K, Zhu L, Cady-Pereira K, Chan Miller C, Chance K, Clarisse L, et al. A physics-based approach to oversample  
258 multi-satellite, multispecies observations to a common grid. *Atmos Meas Tech* 2018;11:6679–701.  
259 <https://doi.org/10.5194/amt-11-6679-2018>.
- 260 [13] Martin, Van, Damme, Lieven, Clarisse, Simon, et al. Industrial and agricultural ammonia point sources exposed.  
261 *Nature* 2018.  
262
