# Supplementary material for: A versatile spaceborne architecture for immediate monitoring of the global methane pledge
Source: Copernicus journal article supplement (doi:10.5194/acp-2022-518), 2022-07-21
Supplement: Supplementary file [file acp-2022-518-AC1-supplement.pdf]

1 **Reply to comments on “Toward a versatile spaceborne architecture**  
2 **for immediate monitoring of the global methane pledge” by Yuchen**  
3 **Wang et al.**  
4

5 **Reply to Reviewer #1:**  
6

7 This paper proposes an interesting method to address the important issue of quantifying current methane emissions. The  
8 authors justifiably argue that no current satellite instrument provides both the coverage and the spatial resolution to accurately  
9 measure global methane concentrations; to address this lack they propose a two-step method that uses data from two very  
10 different instruments: the wide swath, coarse spatial resolution TROPOMI and narrow swath but very high spatial resolution  
11 PRISMA. The TROPOMI data are used to locate high methane emission regions and the methane hotspots within these regions,  
12 then the co-located PRISMA data are examined for the presence of plumes. Emissions over the hotspots and plumes are  
13 estimated by combining wind speed information with an integrated mass enhancement model.

14 The approach is demonstrated for short periods over five small regions and the results are compared with surveys over  
15 two other regions. The median and range of the plume emissions are qualitatively consistent with those obtained using data  
16 from another (non-specified) satellite instrument over the Permian basin, and much higher than those from an aircraft campaign  
17 over California. The hotspot and plume emissions are also compared with emissions from the EDGAR\_v6.0 inventory; the  
18 hotspot emissions were somewhat consistent with the inventory, while the plume emissions were much higher.

19 Summarizing the above, this is an interesting method with very interesting results. The authors evidently put a great deal  
20 of effort and enthusiasm into this work. However, the paper presents several problems, principally lack of detail on how some  
21 of the results were obtained. I have listed the main technical issues below, which need to be addressed before the paper can be  
22 published. An overarching issue is English language usage. Verb tenses are frequently used incorrectly (e.g, past or conditional  
23 future for present), and nouns and adjectives are interchanged. Before resubmitting the authors should have either a native  
24 English speaker or someone with excellent English revise the paper. I will be happy to provide more specific wording changes  
25 once this been done, if they are still necessary.

26 **Response:** We truly appreciate these positive responses and thorough summarizations. We are also very grateful for the  
27 valuable comments and suggestions and have addressed all of them in our revised manuscript. Particularly, we have  
28 supplemented more technical details to clarify the procedure of our framework. In addition, our co-authors (involving native  
29 English speakers) have carefully gone through the entire manuscript to improve the English level.

30 The followings are our point-to-point responses to the reviewer’s comments. The responses are shown in brown font,  
31 while the added/rewritten parts are presented in blue font. All revised figures and tables are also included in the manuscripts.  
32

33 1. The method for identifying high emission areas and plumes appears to be visual identification. The authors do mention  
34 a Boolean mask for identifying the former, but no details are provided and the reader is left wondering what this means. This  
35 needs to be clarified. Such an intensive method is feasible for a small analysis, such as presented in figures 1-3, but obviously  
36 not for long term, global emission estimates. Here the authors suggest a machine learning approach for further applications of  
37 their method, which is a reasonable suggestion. However, this issue makes the year long results presented in S3 and S4  
38 questionable. Were the TROPOMI maps obtained by applying the Sun oversampling method for an entire year over the original  
39 methane concentrations? If so which wind fields were used to obtain the emissions, both for the regional and plume estimates?  
40 How were the PRISMA data averaged over the year? Given the variability in wind direction, I don't think it makes sense to  
41 look for plumes in averaged data. These plots need to either explained in much greater detail, or omitted entirely from the  
42 paper. If they are to be included, then the authors need to be clear which results (short term or annual) are used in all other  
43 plots.

44 **Response:** Thank you for these valuable comments and suggestions. First, we have supplemented more technical details  
45 to clarify the role of the Boolean mask method. As you pointed out, in the first tier of our framework, we apply visual inspection  
46 to identify methane hotspots using the TROPOMI-based methane retrievals. The transformation from visual inspection to  
47 automatic recognition would significantly advance long-term, global methane monitoring. However, no satisfactory set of  
48 criteria is found that could be suitable for this study. This was mainly because, in localized regions, methane budgets respond  
49 to the changes in not only super-emitters but also complex external factors (e.g., meteorology, topography, and background  
50 concentrations). Similar compromises are also adopted in previous studies. Therefore, automatic recognition enabled by  
51 artificial intelligence would play an essential role in the versatile spaceborne architecture for long-term, global methane  
52 monitoring (Ouerghi et al., 2021; Paoletti et al., 2018; Yang et al., 2018; Yu et al., 2017; Zhang et al., 2018).

53 Regarding the identified methane hotspots, we utilize a Boolean mask to select plume-influenced pixels downwind of the  
54 source. The background distribution (mean  $\pm$  standard deviation) is defined by an upwind sample of the measured columns, in  
55 which the hourly wind field data came from the ERA5 reanalysis dataset produced by the European Centre for Medium-Range  
56 Weather Forecasts (ECMWF) (Hoffmann et al., 2019). We then sample the surrounding ( $5 \times 5$ ) pixels centred on each pixel  
57 and compare the corresponding distributions to the background distribution based on a Student's t-test. Pixels with a  
58 distribution substantially higher than the background at a confidence level of 95% are assigned to the plume. More details in  
59 the Boolean plume mask can be found in previous studies (Pandey et al., 2019; Varon et al., 2018).

60 Second, we agree that it might make no sense to look for plumes in averaged data due to the variable wind direction and  
61 have thus omitted the oversampled methane maps in the first tier of our framework (Fig. S3). In turn, using year-round  
62 snapshots in the second tier of our framework, we inspect the identified super-emitters (Figs. 1b ~ 1g) repeatedly and find  
63 more methane plumes as expected (Fig. S4). This reinforces the above hypothesis for the widespread occurrence of methane  
64 super-emitters.

65 **Added/rewritten part in Sect. 2.3:** In the first tier of our framework, we apply visual inspection to identify methane  
66 hotspots using the TROPOMI-based methane retrievals. The transformation from visual inspection to automatic recognition

67 would significantly advance long-term, global methane monitoring. However, no satisfactory set of criteria is found that could  
68 be suitable for this study. This was mainly because, in localized regions, methane budgets respond to the changes in not only  
69 super-emitters but also complex external factors (e.g., meteorology, topography, and background concentrations). Similar  
70 compromises are also adopted in previous studies. Therefore, automatic recognition enabled by artificial intelligence would  
71 play an essential role in the versatile spaceborne architecture for long-term, global methane monitoring (Ouerghi et al., 2021;  
72 Paoletti et al., 2018; Yang et al., 2018; Yu et al., 2017; Zhang et al., 2018).

73 Regarding the identified methane hotspots, we utilize a Boolean mask to select plume-influenced pixels downwind of the  
74 source. The background distribution (mean  $\pm$  standard deviation) is defined by an upwind sample of the measured columns, in  
75 which the hourly wind field data came from the ERA5 reanalysis dataset produced by the European Centre for Medium-Range  
76 Weather Forecasts (ECMWF) (Hoffmann et al., 2019). We then sample the surrounding ( $5 \times 5$ ) pixels centred on each pixel  
77 and compare the corresponding distributions to the background distribution based on a Student's t-test. Pixels with a  
78 distribution substantially higher than the background at a confidence level of 95% are assigned to the plume. More details in  
79 the Boolean plume mask can be found in previous studies (Pandey et al., 2019; Varon et al., 2018).

80 **Added/rewritten part in Sect. 3.2:** To further explore such a hypothesis, we extend the temporal sample window of our  
81 multi-tiered framework. Using year-round snapshots in the second tier of our framework, we inspect the identified super-  
82 emitters (Figs. 1b ~ 1g) repeatedly and find more methane plumes as expected (Fig. S3). This reinforces the above hypothesis  
83 for the widespread occurrence of methane super-emitters.

84

85 2. The plume maps would be more interesting if the plume source were clearly marked.

86 **Response:** Thanks. We have marked all the plume sources in Fig. 1 and Fig. S3.

87

88 3. How was the background vector used in equation 1 derived?

89 **Response:** Thanks. We have supplemented brief descriptions for this issue. The  $\vec{\mu}$  and  $\Sigma$  represent the mean background  
90 radiance and corresponding covariance, respectively, calculated with their common formulas after subtracting the current  
91 signal estimates from the data. Specifically, the  $\vec{\mu}$  is calculated from the data with the removal of the most recent enhancement  
92 estimates, while the  $\Sigma$  is then calculated with updated  $\vec{\mu}$  and the most recent enhancement estimates. More technical details are  
93 reported in previous studies (Foote et al., 2020). Note that, owing to the non-uniform response of individual detectors in  
94 PRISMA, they are calculated based on per-column spectrums in order to consider different responses of across-track detectors  
95 to radiance.

96 **Added/rewritten part in Sect. 2.2:** The  $\vec{\mu}$  and  $\Sigma$  represent the mean background radiance and corresponding covariance,  
97 respectively, calculated with their common formulas after subtracting the current signal estimates from the data. Specifically,  
98 the  $\vec{\mu}$  is calculated from the data with the removal of the most recent enhancement estimates, while the  $\Sigma$  is then calculated  
99 with updated  $\vec{\mu}$  and the most recent enhancement estimates. More technical details are reported in previous studies (Foote et

100 al., 2020). Note that, owing to the non-uniform response of individual detectors in PRISMA, they are calculated based on per-  
101 column spectrums in order to consider different responses of across-track sensors to radiance.

102

103 4. What does this sentence mean: methane enhancements detected in spectrometers generally exhibit sparsity, especially  
104 over low albedo surfaces.

105 **Response:** Sorry for the confusion we caused. We have revised this sentence to clarify this issue. In principle, it would  
106 be more difficult to detect methane enhancements in pixels over low-albedo surfaces. Although methane absorption is  
107 independent of albedo, the resulting signal in absolute radiance is weakened with surface albedo decreasing.

108 **Added/rewritten part in Sect. 2.2:** In principle, it would be more difficult to detect methane enhancements in pixels  
109 over low-albedo surfaces. Although methane absorption is independent of albedo, the resulting signal in absolute radiance is  
110 weakened with surface albedo decreasing.

111

112 5. Please define the co-location criteria between the TROPOMI and PRISMA datasets.

113 **Response:** Thanks. We have supplemented the definition the co-location criteria between the TROPOMI and PRISMA  
114 datasets. Regarding the identified regional hotspots, we also apply visual inspection to search for plumes within their  
115 surrounding 30 km scales (i.e., corresponding to the swath width of PRISMA) in the second tier of our framework.

116 **Added/rewritten part in Sect. 2.3:** Regarding the identified regional hotspots, we also apply visual inspection to search  
117 for plumes within their surrounding 30 km scales (i.e., corresponding to the swath width of PRISMA) in the second tier of our  
118 framework (Irakulis-Loitxate et al., 2021; Lauvaux et al., 2022; Martin et al., 2018; Varon et al., 2020).

119

120 6. The section on comparing the TROPOMI/PRISMA results with the California and Permian surveys needs to provide  
121 more detail on those surveys (instrument, time of year, temporal and spatial extent). It also needs to emphasize that these  
122 comparisons are basically tests of reasonableness, not true quantitative comparisons.

123 **Response:** Thanks. We have supplemented more technical details on these surveys. The California survey aims to provide  
124 the first view of methane super-emitters across the state. This survey is conducted with the Next Generation Airborne  
125 Visible/Infrared Imaging Spectrometer (AVIRIS-NG), with 5 nm SWIR spectral sampling, 1.8 km view field, 3 m horizontal  
126 resolution, and 3 km cruise altitude, and contains five campaigns over several months from 2016 to 2018. Moreover, this  
127 instrument is unique due to its high signal-to-noise ratio and is capable of characterizing methane super-emitters with emissions  
128 as small as 2 ~ 10 kg/h for typical surface winds of 5 m/s.

129 The Permian survey takes advantage of imaging spectroscopy technologies to provide the first spaceborne region-scale  
130 and high-resolution survey of methane super-emitters in the Permian basin. This survey is acquired by 30 hyperspectral images  
131 from three satellite missions, including Gaofen-5, ZY1, and PRISMA, and focuses on an area of roughly 200 × 150 km<sup>2</sup> in the  
132 Delaware sub-basin of the Permian basin within several days (mostly on four different dates: 15 May 2019, 1 November 2019,

133 29 December 2019, and 8 February 2020). More technical details on these two surveys can be found in previous studies (Duren  
134 et al., 2019; Irakulis-Loitxate et al., 2021).

135 Moreover, we agree that such comparisons are basically reasonableness test rather than stringently quantitative validations  
136 due to measurement divergencies between these datasets (e.g., spatial resolution and detection limit). Collectively, although  
137 such comparisons are not quantitative comparisons due to measurement divergencies between these datasets (e.g., spatial  
138 resolution and detection limit), they offer further context for the emission magnitude of the identified methane super-emitters  
139 and indicate the outstanding strength of our results that could be analogous to abundant outcomes from field campaigns. More  
140 importantly, this highlights the urgent need for global monitoring of ‘nameless’ O&G facilities that possibly emit methane as  
141 much as the California field and Permian basin.

142 **Added/rewritten part in Sect. 3.2:** The California survey aims to provide the first view of methane super-emitters across  
143 the state. This survey is conducted with the Next Generation Airborne Visible/Infrared Imaging Spectrometer (AVIRIS-NG),  
144 with 5 nm SWIR spectral sampling, 1.8 km view field, 3 m horizontal resolution, and 3 km cruise altitude, and contains five  
145 campaigns over several months from 2016 to 2018. Moreover, this instrument is unique due to its high signal-to-noise ratio  
146 and is capable of characterizing methane super-emitters with emissions as small as 2 ~ 10 kg/h for typical surface winds of 5  
147 m/s.

148 The Permian survey takes advantage of imaging spectroscopy technologies to provide the first spaceborne region-scale  
149 and high-resolution survey of methane super-emitters in the Permian basin. This survey is acquired by 30 hyperspectral images  
150 from three satellite missions, including Gaofen-5, ZY1, and PRISMA, and focuses on an area of roughly 200 × 150 km<sup>2</sup> in the  
151 Delaware sub-basin of the Permian basin within several days (mostly on four different dates: 15 May 2019, 1 November 2019,  
152 29 December 2019, and 8 February 2020). More technical details on these two surveys can be found in previous studies (Duren  
153 et al., 2019; Irakulis-Loitxate et al., 2021).

154 Collectively, although such comparisons are not quantitative comparisons due to measurement divergencies between  
155 these datasets (e.g., spatial resolution and detection limit), they offer further context for the emission magnitude of the  
156 identified methane super-emitters and indicate the outstanding strength of our results that could be analogous to abundant  
157 outcomes from field campaigns. More importantly, this highlights the urgent need for global monitoring of ‘nameless’ O&G  
158 facilities that possibly emit methane as much as the California field and Permian basin.

159  
160 7. The phrase “on a per column basis” is frequently used: what does this mean?

161 **Response:** Sorry for the confusion we caused. We have supplemented some sentences to explain this phrase at its first  
162 appearance. The matched-filter algorithm focuses on the individual columns rather than the whole scene to resolve methane  
163 enhancements. This means that the methane enhancement per column is calculated separately (i.e., methane enhancements  
164 were calculated on a per-column basis). More explanations can be found in Guanter et al. (2021).

165 **Added/rewritten part in Sect. 2.2:** The matched-filter algorithm focuses on the individual columns rather than the whole  
166 scene to resolve methane enhancements. This means that the methane enhancement per column is calculated separately (i.e.,  
167 methane enhancements were calculated on a per-column basis). More explanations can be found in Guanter et al. (2021).

168

169 8. The detailed uncertainty analysis is confusing, disorganized and hard to follow. Please put some more thought in how  
170 to present this information.

171 **Response:** Thank you very much for this constructive suggestion. We have reorganized and revised the detailed  
172 uncertainty analysis in Supplementary Information to clarify this issue, which has been explicitly divided into three sub-issues:  
173 (1) uncertainties in the PRISMA-based methane retrievals; (2) uncertainties in the TROPOMI-based methane emission  
174 estimates; and (3) uncertainties in PRISMA-based methane emission estimates. Note that operational TROPOMI-based  
175 methane retrieval products have been evaluated strictly and proved to be reliable globally (except in low- and high-albedo and  
176 snow-covered areas) (Lorente et al., 2021; Sha et al., 2021) and the related uncertainty analysis is thus omitted here. As a result,  
177 we could confirm the reliable performance of our framework. Comprehensive uncertainty analysis is illustrated in  
178 Supplementary Information.

179

## 180 Reference

- 181 Duren, R. M., Thorpe, A. K., Foster, K. T., Rafiq, T., Hopkins, F. M., Yadav, V., Bue, B. D., Thompson, D. R., Conley, S.  
182 and Colombi, N. K.: California's methane super-emitters, *Nature*, 575(7781), 180–184, 2019.
- 183 Foote, M. D., Dennison, P. E., Thorpe, A. K., Thompson, D. R., Jongaramrungruang, S., Frankenberg, C. and Joshi, S. C.:  
184 Fast and Accurate Retrieval of Methane Concentration From Imaging Spectrometer Data Using Sparsity Prior, *IEEE Trans.*  
185 *Geosci. Remote Sens.*, 58(9), 6480–6492, doi:10.1109/TGRS.2020.2976888, 2020.
- 186 Hoffmann, L., Günther, G., Li, D., Stein, O., Wu, X., Griessbach, S., Heng, Y., Konopka, P., Müller, R., Vogel, B. and  
187 Wright, J. S.: From ERA-Interim to ERA5: the considerable impact of ECMWF's next-generation reanalysis on Lagrangian  
188 transport simulations, *Atmos. Chem. Phys.*, 19(5), 3097–3124, doi:10.5194/acp-19-3097-2019, 2019.
- 189 Irakulis-Loitxate, I., Guanter, L., Liu, Y.-N., Varon, D. J., Maasakkers, J. D., Zhang, Y., Chulakadabba, A., Wofsy, S. C.,  
190 Thorpe, A. K., Duren, R. M. and Others: Satellite-based survey of extreme methane emissions in the Permian basin, *Sci.*  
191 *Adv.*, 7(27), eabf4507, doi:10.1126/sciadv.abf4507, 2021.
- 192 Lauvaux, T., Giron, C., Mazzolini, M., d'Aspremont, A., Duren, R., Cusworth, D., Shindell, D. and Ciais, P.: Global  
193 assessment of oil and gas methane ultra-emitters, *Science* (80-. ), 375(6580), 557–561, 2022.
- 194 Lorente, A., Borsdorff, T., Butz, A., Hasekamp, O., aan de Brugh, J., Schneider, A., Wu, L., Hase, F., Kivi, R., Wunch, D.,  
195 Pollard, D. F., Shiomi, K., Deutscher, N. M., Velazco, V. A., Roehl, C. M., Wennberg, P. O., Warneke, T. and Landgraf, J.:  
196 Methane retrieved from TROPOMI: improvement of the data product and validation of the first 2 years of measurements,  
197 *Atmos. Meas. Tech.*, 14(1), 665–684, doi:10.5194/amt-14-665-2021, 2021.

198 Martin, Van, Damme, Lieven, Clarisse, Simon, Whitburn, Juliette, Hadji-Lazaro and Daniel: Industrial and agricultural  
199 ammonia point sources exposed, *Nature*, 2018.

200 Ouerghi, E., Ehret, T., de Franchis, C., Facciolo, G., Lauvaux, T., Meinhardt, E. and Morel, J.-M.: Detection of methane  
201 plumes in hyperspectral images from SENTINEL-5P by coupling anomaly detection and pattern recognition, *ISPRS Ann.*  
202 *Photogramm. Remote Sens. Spat. Inf. Sci.*, V-3–2021, 81–87, doi:10.5194/isprs-annals-V-3-2021-81-2021, 2021.

203 Pandey, S., Gautam, R., Houweling, S., Van Der Gon, H. D., Sadavarte, P., Borsdorff, T., Hasekamp, O., Landgraf, J., Tol,  
204 P. and Van Kempen, T.: Satellite observations reveal extreme methane leakage from a natural gas well blowout, *Proc. Natl.*  
205 *Acad. Sci.*, 116(52), 26376–26381, 2019.

206 Paoletti, M. E., Haut, J. M., Plaza, J. and Plaza, A.: A new deep convolutional neural network for fast hyperspectral image  
207 classification, *ISPRS J. Photogramm. Remote Sens.*, 145, 120–147, doi:https://doi.org/10.1016/j.isprsjprs.2017.11.021, 2018.

208 Sha, M. K., Langerock, B., Blavier, J.-F. L., Blumenstock, T., Borsdorff, T., Buschmann, M., Dehn, A., De Mazière, M.,  
209 Deutscher, N. M., Feist, D. G., García, O. E., Griffith, D. W. T., Grutter, M., Hannigan, J. W., Hase, F., Heikkinen, P.,  
210 Hermans, C., Iraci, L. T., Jeseck, P., Jones, N., Kivi, R., Kumps, N., Landgraf, J., Lorente, A., Mahieu, E., Makarova, M. V.,  
211 Mellqvist, J., Metzger, J.-M., Morino, I., Nagahama, T., Notholt, J., Ohyama, H., Ortega, I., Palm, M., Petri, C., Pollard, D.  
212 F., Rettinger, M., Robinson, J., Roche, S., Roehl, C. M., Röhlings, A. N., Rousogonous, C., Schneider, M., Shiomi, K., Smale,  
213 D., Stremme, W., Strong, K., Sussmann, R., Té, Y., Uchino, O., Velazco, V. A., Vigouroux, C., Vrekoussis, M., Wang, P.,  
214 Warneke, T., Wizenberg, T., Wunch, D., Yamanouchi, S., Yang, Y. and Zhou, M.: Validation of methane and carbon  
215 monoxide from Sentinel-5 Precursor using TCCON and NDACC-IRWG stations, *Atmos. Meas. Tech.*, 14(9), 6249–6304,  
216 doi:10.5194/amt-14-6249-2021, 2021.

217 Varon, D. J., Jacob, D. J., McKeever, J., Jervis, D., Durak, B. O. A., Xia, Y. and Huang, Y.: Quantifying methane point  
218 sources from fine-scale satellite observations of atmospheric methane plumes, *Atmos. Meas. Tech.*, 11(10), 5673–5686,  
219 doi:10.5194/amt-11-5673-2018, 2018.

220 Varon, D. J., Jacob, D. J., Jervis, D. and McKeever, J.: Quantifying Time-Averaged Methane Emissions from Individual  
221 Coal Mine Vents with GHGSat-D Satellite Observations, *Environ. Sci. Technol.*, 54(16), 10246–10253,  
222 doi:10.1021/acs.est.0c01213, 2020.

223 Yang, X., Ye, Y., Li, X., Lau, R. Y. K., Zhang, X. and Huang, X.: Hyperspectral Image Classification With Deep Learning  
224 Models, *IEEE Trans. Geosci. Remote Sens.*, 56(9), 5408–5423, doi:10.1109/TGRS.2018.2815613, 2018.

225 Yu, S., Jia, S. and Xu, C.: Convolutional neural networks for hyperspectral image classification, *Neurocomputing*, 219, 88–  
226 98, doi:https://doi.org/10.1016/j.neucom.2016.09.010, 2017.

227 Zhang, M., Li, W. and Du, Q.: Diverse Region-Based CNN for Hyperspectral Image Classification, *IEEE Trans. Image*  
228 *Process.*, 27(6), 2623–2634, doi:10.1109/TIP.2018.2809606, 2018.

229
